# Supplementary material for: Effects of Neuropilates on Functional Outcomes in Chronic Stroke: A Randomized Clinical Trial
Source: MDPI journal article supplement (doi:10.3390/healthcare12080850), 2024-04-17
Supplement: s1 [file s1]

## Supplementary Materials

**Table S1.** Neuropilates session protocol.

| First session of the week  |                                                 |                               |
|----------------------------|-------------------------------------------------|-------------------------------|
|                            | Exercise                                        | Repetitions (Time)            |
| Warm-up                    | Breathing                                       | 20 times (1 minute)           |
|                            | Arm Circles                                     | 10 times per arm (2 minutes)  |
|                            | The Spine Stretch                               | 20 times (2 minutes)          |
| Main exercise              | The One Leg Circle                              | 10 times per leg (4 minutes)  |
|                            | Break and explanation of the following exercise | (1 minute)                    |
|                            | The Shoulder Bridge                             | 15 times (2 minutes)          |
|                            | Break and explanation of the following exercise | (1 minute)                    |
|                            | The Hundred                                     | (2 minutes)                   |
| Cool-Down                  | The Saw                                         | 10 times per side (3 minutes) |
|                            | Cat Stretch                                     | 15 times (2 minutes)          |
| Second session of the week |                                                 |                               |
|                            | Exercise                                        | Repetitions (Time)            |
| Warm-up                    | Breathing                                       | 20 times (1 minute)           |
|                            | Arm Circles                                     | 10 times per arm (2 minutes)  |
|                            | The Spine Stretch                               | 20 times (2 minutes)          |
| Main exercise              | The Shoulder Bridge                             | 15 times (2 minutes)          |
|                            | Break and explanation of the following exercise | (1 minute)                    |
|                            | The Teaser                                      | 8 times (4 minutes)           |
|                            | Break and explanation of the following exercise | (1 minute)                    |
|                            | Push up                                         | 8 times (2 minutes)           |
| Cool-Down                  | Hip Circles                                     | 10 times per leg (3 minutes)  |
|                            | Cat Stretch                                     | 15 times (2 minutes)          |
